# Supplementary material for: Rewritable magnetic fluorescence-encoded microspheres: preparation, characterization, and recycling
Source: Royal Society of Chemistry journal article supplement (doi:10.1039/c5tc01301a), 2015-01-01
Supplement: c5tc01301a1.pdf [file c5tc01301a1.pdf]

## Supporting Information

### Rewritable Magnetic Fluorescent-Encoded Microspheres: Preparation, Characterization, and Recycling

Yan Li,<sup>a</sup> Youshen Wu,<sup>a</sup> Cheng Luo,<sup>b</sup> Bo Wang<sup>c</sup> and Daocheng Wu<sup>\*a</sup>

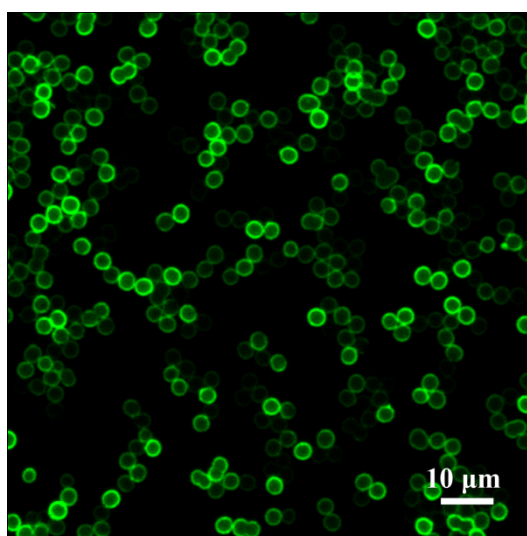

**Fig.S1** LSCM images of magnetic fluorescent MS-MF microspheres with different Rh 110 doping concentrations.

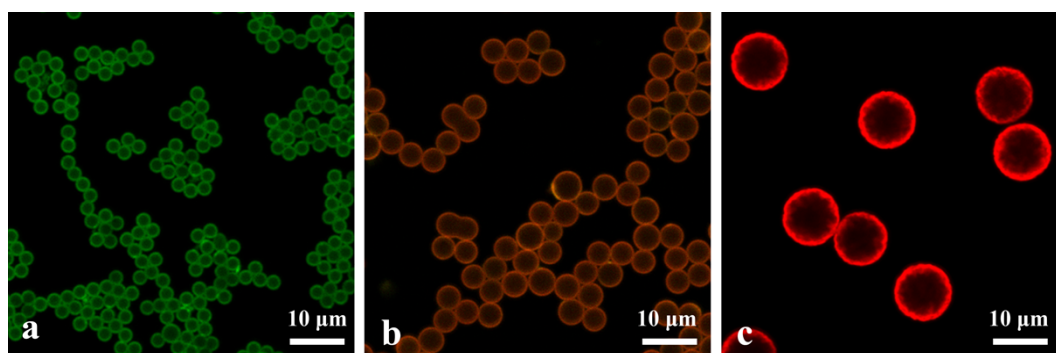

**Fig.S2** LSCM images of different sized polystyrene microspheres coated with fluorescent MF shell, a: Rh 110 doped, b: Rh 110/SRh 101 co-doped, c: SRh 101 doped. The polystyrene microspheres in a and b were of smooth surfaces whereas the microspheres in c were of mesoporous surface structure. After fluorescent MF shell coating, the structure differences could be easily distinguished through the fluorescence distribution.

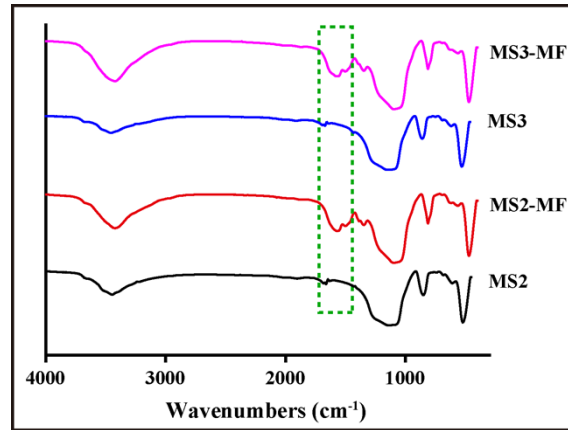

**Fig.S3** FTIR spectra of MS-MF microspheres with different writing-erasing cycles.

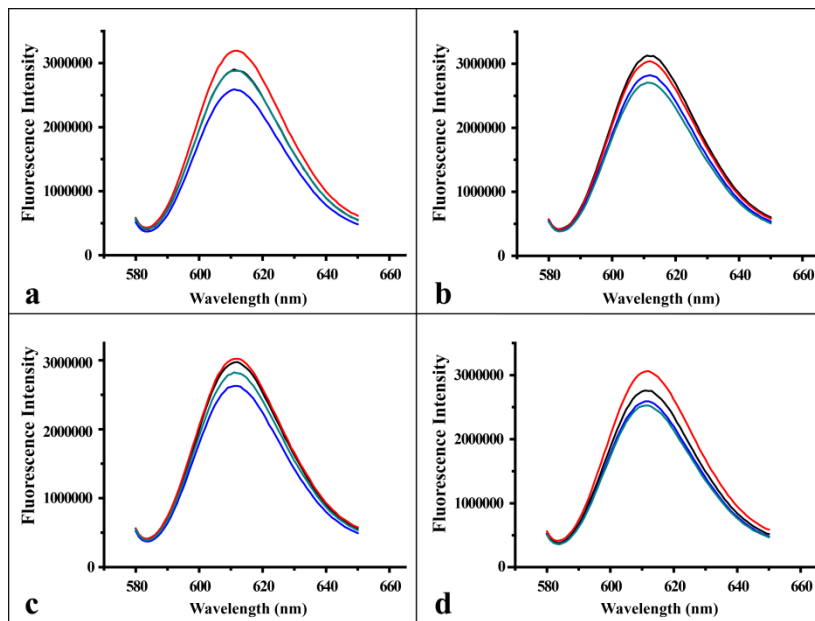

**Fig.S4** Fluorescence emission spectra of SRh 101 doped magnetic fluorescent microspheres with different writing-erasing cycles. (a) MS0-MF, (b) MS1-MF, (c) MS2-MF, (d) MS3-MF. Each sample was independently prepared and recorded for four times.

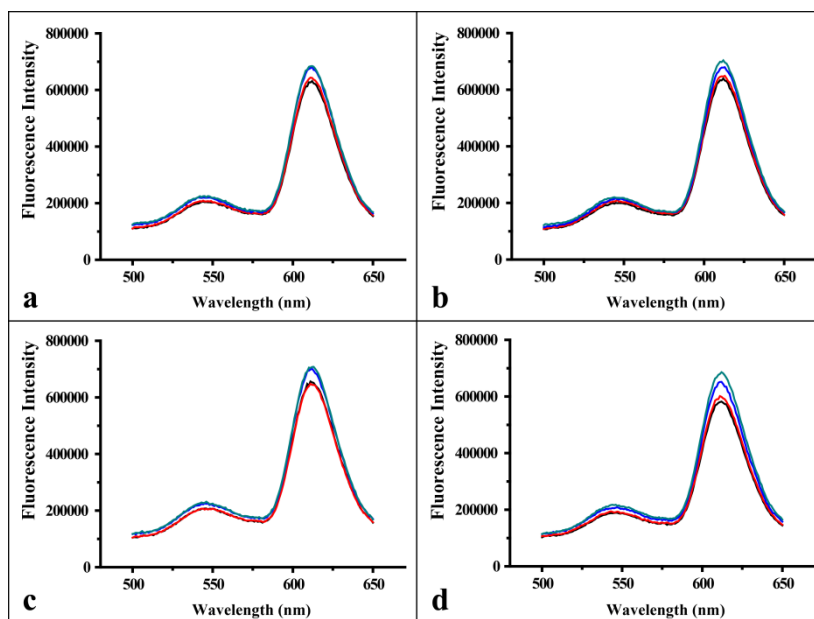

**Fig.S5** Fluorescence emission spectra of Rh 110-SRh 101 dual-doped magnetic fluorescent microspheres with different writing-erasing cycles. (a) MS0-MF, (b) MS1-MF, (c) MS2-MF, (d) MS3-MF. Each sample was independently prepared and recorded for four times.

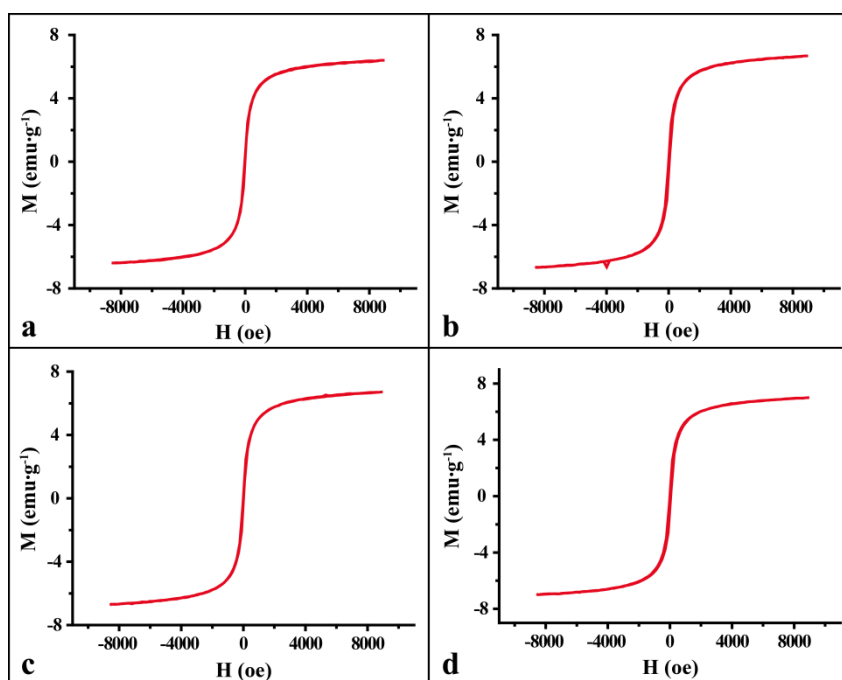

**Fig.S6** Magnetic hysteresis loops of magnetic fluorescent MS-MF microspheres with different writing-erasing cycles. (a) MS0-MF, (b) MS1-MF, (c) MS2-MF, (d) MS3-MF.

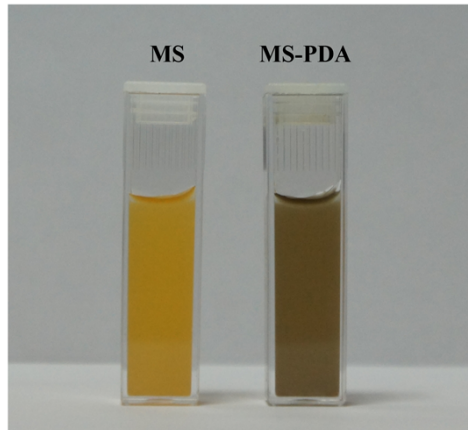

**Fig.S7** The photographs of recycled magnetic MS microspheres and MS microspheres modified with polydopamine coating (MS-PDA).
